# Supplementary material for: A Phosphorylcholine-Containing Glycolipid-like Antigen Present on the Surface of Infective Stage Larvae of Ascaris spp. Is a Major Antibody Target in Infected Pigs and Humans
Source: PLOS journal article supplement (doi:10.1371/journal.pntd.0005166), 2016-12-01

**Supplemental Figure 2: HPLC analysis of AA-labelled monosaccharides obtained from As12 after TFA hydrolysis.** The As12 monosaccharide composition is identified by comparison with the equimolar monosaccharide standard mixture, indicating that the glycan of As12 is composed of GalNAc, GlcNAc and a minor amount of Glc. Minor unknown peaks are indicated (\*).

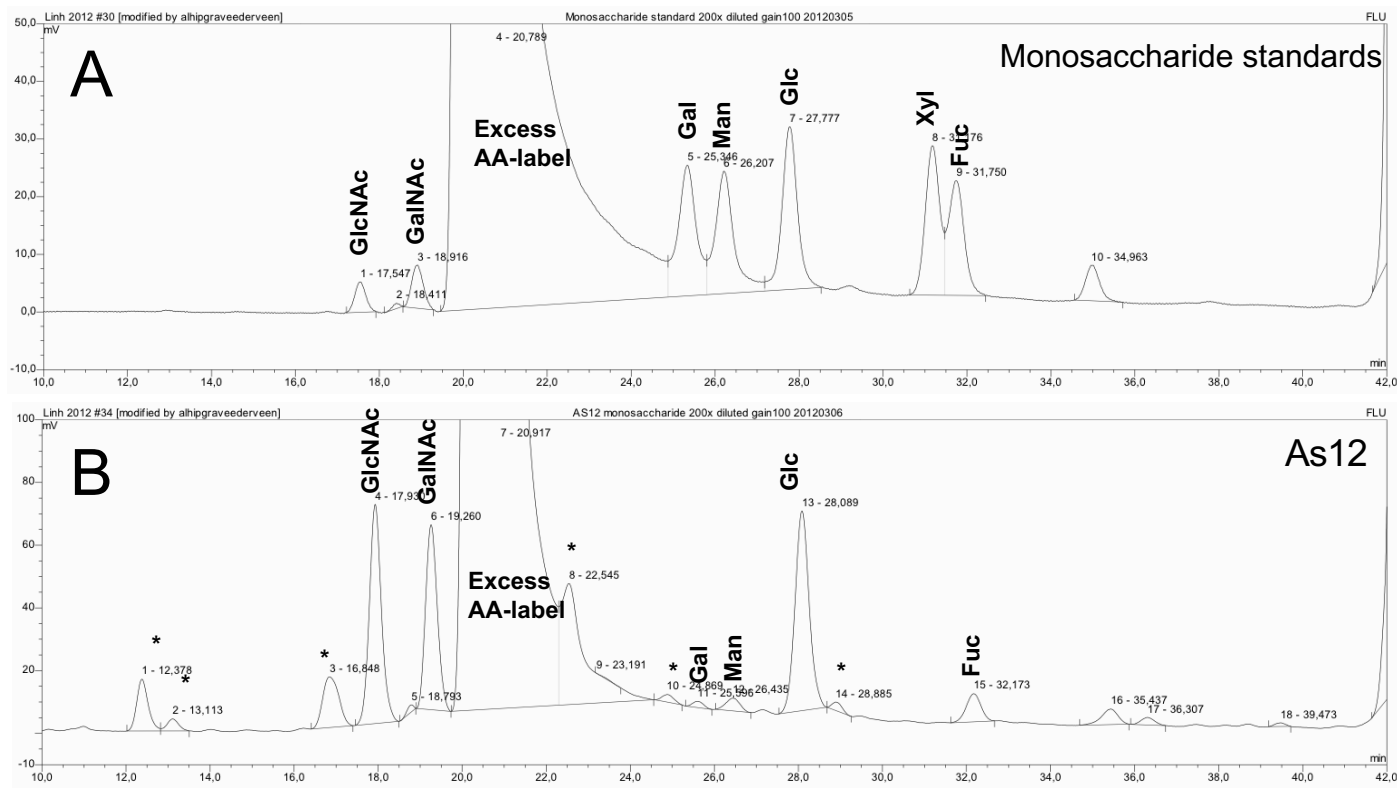

Supplement: S2 (10.1371/journal.pntd.0005166.s002) [file journal.pntd.0005166.s002]
